# Supplementary material for: The Association between Serum 25(OH)D Status and Blood Pressure in Participants of a Community-Based Program Taking Vitamin D Supplements
Source: PubMed Central journal article supplement (PMC5707716; doi:10.3390/nu9111244), 2017-11-14
Supplement: nutrients-09-01244-s001.pdf [file nutrients-09-01244-s001.pdf]

## Supplementary Material

**Table S1.** Baseline comparison of blood pressure measures, serum 25(OH)D and vitamin D supplementation dose according to age groups

| Baseline measure                       | Age Range (yr) | N     | Mean               | SD   | P-value* |
|----------------------------------------|----------------|-------|--------------------|------|----------|
| <b>Systolic blood pressure (mmHg)</b>  | < 35           | 947   | 116 <sup>d</sup>   | 12   | < 0.001  |
|                                        | 35-44          | 831   | 118 <sup>c</sup>   | 14   |          |
|                                        | 45-64          | 3,823 | 125 <sup>b</sup>   | 16   |          |
|                                        | ≥ 65           | 2,554 | 132 <sup>a</sup>   | 18   |          |
|                                        | Total          | 8,155 | 125                | 17   |          |
| <b>Diastolic blood pressure (mmHg)</b> | < 35           | 947   | 73 <sup>d</sup>    | 9    | < 0.001  |
|                                        | 35-44          | 831   | 76 <sup>c</sup>    | 10   |          |
|                                        | 45-64          | 3,823 | 78 <sup>a</sup>    | 10   |          |
|                                        | ≥ 65           | 2,554 | 77 <sup>b</sup>    | 10   |          |
|                                        | Total          | 8,155 | 77                 | 10   |          |
| <b>Pulse Pressure (mmHg)</b>           | < 35           | 947   | 42 <sup>c</sup>    | 9    | < 0.001  |
|                                        | 35-44          | 831   | 43 <sup>c</sup>    | 10   |          |
|                                        | 45-64          | 3,823 | 46 <sup>b</sup>    | 12   |          |
|                                        | ≥ 65           | 2,554 | 54 <sup>a</sup>    | 15   |          |
|                                        | Total          | 8,155 | 48                 | 13   |          |
| <b>Mean Arterial Pressure (mmHg)</b>   | < 35           | 947   | 88 <sup>d</sup>    | 10   | < 0.001  |
|                                        | 35-44          | 831   | 90 <sup>c</sup>    | 11   |          |
|                                        | 45-64          | 3,823 | 94 <sup>b</sup>    | 11   |          |
|                                        | ≥ 65           | 2,554 | 95 <sup>a</sup>    | 11   |          |
|                                        | Total          | 8,155 | 93                 | 11   |          |
| <b>Serum 25(OH)D (nmol/L)</b>          | < 35           | 947   | 84 <sup>bc</sup>   | 41   | < 0.001  |
|                                        | 35-44          | 831   | 83 <sup>c</sup>    | 39   |          |
|                                        | 45-64          | 3,823 | 87 <sup>ab</sup>   | 39   |          |
|                                        | ≥ 65           | 2,554 | 89 <sup>a</sup>    | 31   |          |
|                                        | Total          | 8,155 | 87                 | 37   |          |
| <b>Vitamin D dose (IU/d)</b>           | < 35           | 947   | 1400 <sup>b</sup>  | 2800 | < 0.001  |
|                                        | 35-44          | 831   | 1500 <sup>ab</sup> | 2700 |          |
|                                        | 45-64          | 3,823 | 1700 <sup>a</sup>  | 2600 |          |
|                                        | ≥ 65           | 2,554 | 1500 <sup>ab</sup> | 2000 |          |
|                                        | Total          | 8,155 | 1600               | 2500 |          |
| <b>BMI (kg/m<sup>2</sup>)</b>          | < 35           | 947   | 26 <sup>c</sup>    | 5    | < 0.001  |
|                                        | 35-44          | 831   | 27 <sup>b</sup>    | 6    |          |
|                                        | 45-64          | 3,823 | 28 <sup>a</sup>    | 6    |          |
|                                        | ≥ 65           | 2,554 | 28 <sup>a</sup>    | 5    |          |
|                                        | Total          | 8,155 | 27                 | 6    |          |

\*One-Way ANOVA, different superscripts denote differences using post-hoc Tukey's test

**Table S2.** Comparison of blood pressure status between baseline and one year (Participants who did not take BP-lowering medication at baseline and follow-up)

|                         | Baseline Status  | One Year Status |                  |              |
|-------------------------|------------------|-----------------|------------------|--------------|
|                         |                  | Normal          | Pre-hypertension | Hypertension |
| <b>Whole population</b> | Normal           | 548 (65)        | 289 (34)         | 9 (1.1)      |
|                         | Pre-hypertension | 378 (36)        | 607 (59)         | 53 (5)       |
|                         | Hypertension     | 8 (7)           | 77 (66)          | 32 (27)      |
| <b>Age &lt; 34 yr</b>   | Normal           | 65 (77)         | 19 (23)          | 0            |
|                         | Pre-hypertension | 19 (51)         | 17 (46)          | 1 (3)        |
|                         | Hypertension     | 0               | 1 (100)          | 0            |
| <b>35 – 44 yr</b>       | Normal           | 55 (81)         | 12 (18)          | 1 (1)        |
|                         | Pre-hypertension | 16 (42)         | 22 (58)          | 0            |
|                         | Hypertension     | 0               | 4 (57)           | 3 (43)       |
| <b>45 – 64 yr</b>       | Normal           | 312 (68)        | 142 (31)         | 4 (1)        |
|                         | Pre-hypertension | 214 (41)        | 270 (52)         | 38 (7)       |
|                         | Hypertension     | 3 (5)           | 39 (64)          | 19 (31)      |
| <b>≥ 65 yr</b>          | Normal           | 116 (49)        | 116 (49)         | 4 (2)        |
|                         | Pre-hypertension | 129 (29)        | 298 (68)         | 14 (3)       |
|                         | Hypertension     | 5 (10)          | 33 (69)          | 10 (21)      |

Chi square test,  $p < 0.001$ , Data presented as number (% within BP status at baseline)

**Table S3.** Blood pressure measures changes over time in whole population and after excluding participants on BP-lowering medication after joining the program, according to BP status

| Study population                      |                  | Whole population<br>(n=8,155) |                   |     |         | After excluding participants on BP<br>meds (n=4,251) |                   |     |                      | Between<br>groups<br>p value* |
|---------------------------------------|------------------|-------------------------------|-------------------|-----|---------|------------------------------------------------------|-------------------|-----|----------------------|-------------------------------|
| Parameter                             | BP status        | N                             | Mean              | SD  | P value | N                                                    | Mean              | SD  | P value <sup>#</sup> |                               |
| Systolic blood<br>pressure<br>change  | normotensive     | 3273                          | 6.0 <sup>a</sup>  | 14  | < 0.01  | 1819                                                 | 5.7 <sup>a</sup>  | 14  | < 0.001              | 0.58                          |
|                                       | pre-hypertensive | 4290                          | -3.8 <sup>b</sup> | 16  |         | 2156                                                 | -4.6 <sup>b</sup> | 16  |                      | 0.81                          |
|                                       | hypertensive     | 592                           | -12 <sup>c</sup>  | 19  |         | 276                                                  | -13 <sup>c</sup>  | 18  |                      | 0.53                          |
| Diastolic<br>blood pressure<br>change | normotensive     | 3273                          | 2.6 <sup>a</sup>  | 9.6 | < 0.01  | 1819                                                 | 2.7 <sup>a</sup>  | 10  | < 0.001              | 0.93                          |
|                                       | pre-hypertensive | 4290                          | -2.0 <sup>b</sup> | 9.5 |         | 2156                                                 | -2.3 <sup>b</sup> | 9.4 |                      | 0.72                          |
|                                       | hypertensive     | 592                           | -10 <sup>c</sup>  | 10  |         | 276                                                  | -10 <sup>c</sup>  | 10  |                      | 0.89                          |
| Pulse Pressure<br>change              | normotensive     | 3273                          | 3.4 <sup>a</sup>  | 12  | < 0.01  | 1819                                                 | 3.0 <sup>a</sup>  | 12  | < 0.001              | 0.48                          |
|                                       | pre-hypertensive | 4290                          | -1.9 <sup>b</sup> | 15  |         | 2156                                                 | -2.3 <sup>b</sup> | 15  |                      | 0.61                          |
|                                       | hypertensive     | 592                           | -1.6 <sup>b</sup> | 16  |         | 276                                                  | -3.0 <sup>b</sup> | 16  |                      | 0.06                          |
| Mean Arterial<br>Pressure<br>change   | normotensive     | 3273                          | 3.8 <sup>a</sup>  | 9.5 | < 0.01  | 1819                                                 | 3.7 <sup>a</sup>  | 9.4 | < 0.001              | 0.88                          |
|                                       | pre-hypertensive | 4290                          | -2.6 <sup>b</sup> | 9.6 |         | 2156                                                 | -3.1 <sup>b</sup> | 9.3 |                      | 0.27                          |
|                                       | hypertensive     | 592                           | -11 <sup>c</sup>  | 11  |         | 276                                                  | -11 <sup>c</sup>  | 11  |                      | 0.98                          |
| Serum<br>25(OH)D<br>change            | normotensive     | 3273                          | 24 <sup>b</sup>   | 43  | < 0.01  | 1819                                                 | 23                | 42  | 0.01                 | 0.97                          |
|                                       | pre-hypertensive | 4290                          | 28 <sup>a</sup>   | 40  |         | 2156                                                 | 27                | 40  |                      | 0.83                          |
|                                       | hypertensive     | 592                           | 31 <sup>a</sup>   | 43  |         | 276                                                  | 28                | 38  |                      | 0.05                          |

<sup>#</sup>One-way ANOVA, different letters show post-hoc test (Tukey test), <sup>\*</sup>Independent T-test,

Table S4. Comparison of changes in blood pressure measures in hypertensive participants according to the season of observation

| <b>BP measure change</b>        | <b>Season</b> | <b>N</b> | <b>Mean ± SD</b> | <b>P value</b> |
|---------------------------------|---------------|----------|------------------|----------------|
| Systolic blood pressure (mmHg)  | Winter        | 309      | -10 ± 17         | 0.02           |
|                                 | Summer        | 283      | -14 ± 20         |                |
| Diastolic blood pressure (mmHg) | Winter        | 309      | -10 ± 10         | 0.47           |
|                                 | Summer        | 283      | -11 ± 10         |                |
| Pulse Pressure (mmHg)           | Winter        | 309      | -0.22 ± 15       | 0.03           |
|                                 | Summer        | 283      | -3.1 ± 18        |                |
| Mean Atrial Pressure (mmHg)     | Winter        | 309      | -10 ± 11         | 0.07           |
|                                 | Summer        | 283      | -12 ± 12         |                |
| Serum 25(OH)D (nmol/L)          | Winter        | 309      | 31 ± 46          | 0.81           |
|                                 | Summer        | 283      | 31 ± 39          |                |

Independent-Samples T-test, winter=November-April, summer=May-October
